# Supplementary material for: Control of Wilt and Rot Pathogens of Tomato by Antagonistic Pink Pigmented Facultative Methylotrophic Delftia lacustris and Bacillus spp
Source: PubMed Central journal article supplement (PMC5097904; doi:10.3389/fpls.2016.01626), 2016-11-07
Supplement: Image4.pdf [file Image4.pdf]

## Supporting Figure S4

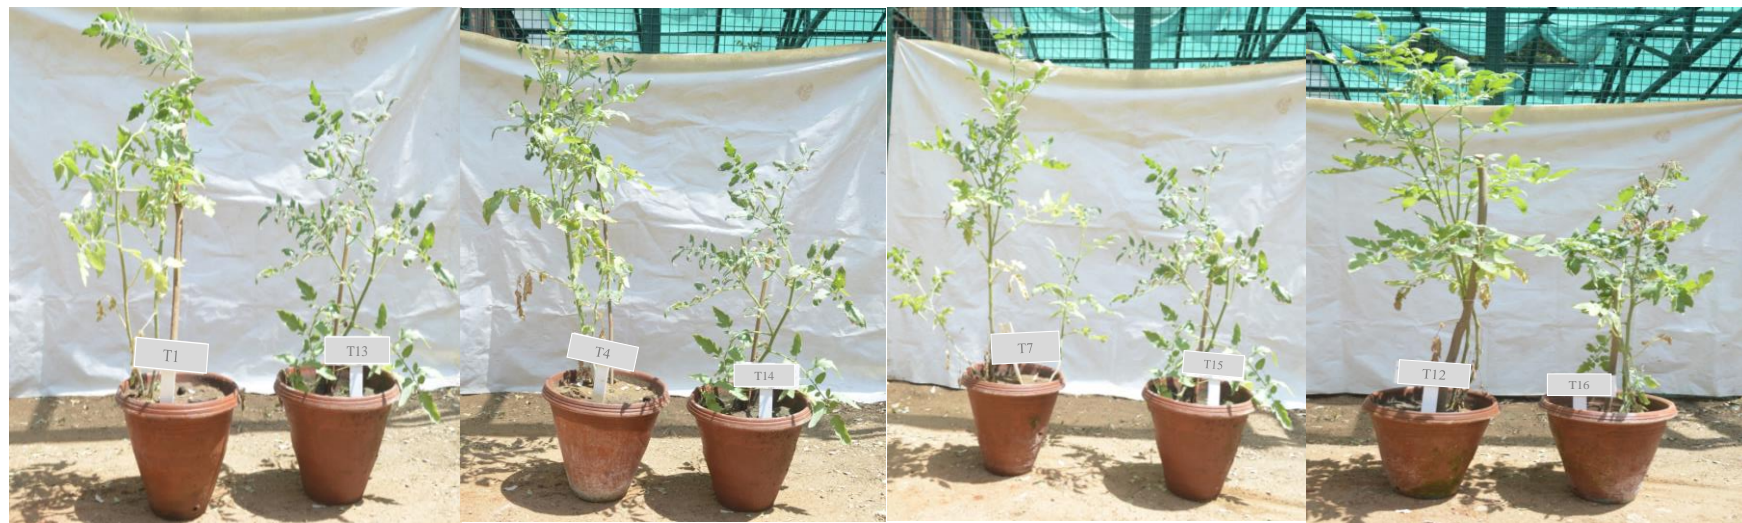

**T1**      **T13**

**T4**      **T14**

**T7**      **T15**

**T12**      **T16**
