# Supplementary material for: Control of Wilt and Rot Pathogens of Tomato by Antagonistic Pink Pigmented Facultative Methylotrophic Delftia lacustris and Bacillus spp
Source: PubMed Central journal article supplement (PMC5097904; doi:10.3389/fpls.2016.01626), 2016-11-07
Supplement: Table1.pdf [file Table1.pdf]

**Table S1. Screening for antagonistic facultative methylotrophs against plant pathogens**

| Isolation source (Leaf) | Isolates | Pathogens                 |                           |                                 |                          |
|-------------------------|----------|---------------------------|---------------------------|---------------------------------|--------------------------|
|                         |          | <i>Fusarium oxysporum</i> | <i>Rhizoctonia solani</i> | <i>Colletotrichum circinans</i> | <i>Alternaria solani</i> |
| Tomato                  | PPT-1    | +                         | +                         | +                               | +                        |
| Jasmine                 | PPJ-1    | -                         | -                         | -                               | -                        |
| Bhendi                  | PPB-1    | +                         | +                         | +                               | +                        |
| Chilli                  | PPC-1    | -                         | -                         | -                               | -                        |
| Onion                   | PPO-1    | +                         | +                         | +                               | +                        |
| Ground nut              | PPGR-1   | +                         | +                         | +                               | +                        |
| Rose                    | PPR-1    | -                         | -                         | -                               | -                        |
| Neem                    | PPN-1    | +                         | +                         | +                               | +                        |
| Tamarind                | PPTA-1   | -                         | -                         | -                               | -                        |
| Prosopios               | PPP-1    | +                         | +                         | +                               | +                        |
| Brinjal                 | PPBJ-1   | +                         | +                         | +                               | +                        |
| Marigold                | PPM-1    | -                         | -                         | -                               | -                        |
| Grasss                  | PPGS-1   | +                         | +                         | +                               | +                        |
| Pomegranate             | PPPO-1   | -                         | -                         | -                               | -                        |
| Bouganivillea           | PPBO-1   | +                         | +                         | +                               | +                        |
| Sapota                  | PPS-1    | -                         | -                         | -                               | -                        |
| Guava                   | PPG-1    | +                         | +                         | +                               | +                        |
| Parthenium              | PPPA-1   | +                         | +                         | +                               | +                        |
| Papaya                  | PPPAP-1  | -                         | -                         | -                               | -                        |
| Lime                    | PPL-1    | +                         | +                         | +                               | +                        |
